# Supplementary material
Source: PubMed Central journal article supplement (PMC5770316)
Supplement: BLT-16-063_Supplementary_content.pdf [file BLT-16-063_Supplementary_content.pdf]

### Online Supplementary Content

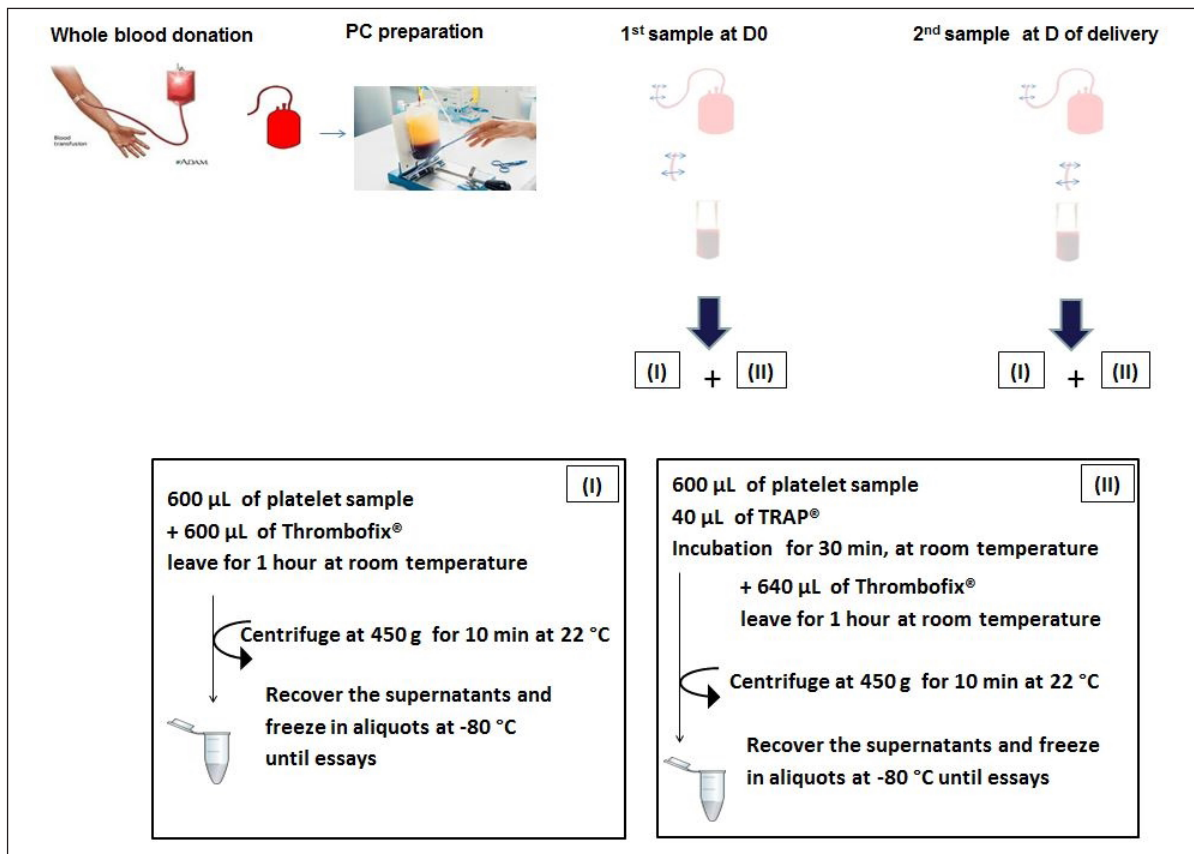

Online Supplementary Figure S1 - Diagram of the study design.

PC: platelet concentrate; D: day; TRAP: thrombin receptor activator peptide.

**Online Supplementary Table SI** - The main cells that secrete BRM and the relative amounts secreted.

|               | Platelets | Monocytes/Macrophages | T lymphocytes |
|---------------|-----------|-----------------------|---------------|
| sCD40L        | +++       |                       | +             |
| sCD62P        | +++       |                       |               |
| RANTES        | +++       |                       | ++            |
| TNF- $\alpha$ | +         | +++                   | ++            |
| IL-1 $\beta$  | +         | +++                   | +             |
| IL-8          | +         | +++                   |               |

BRM: biological response modifier; RANTES: regulated on activation, normal T cell expressed and secreted; TNF: tumor necrosis factor; IL: interleukin.

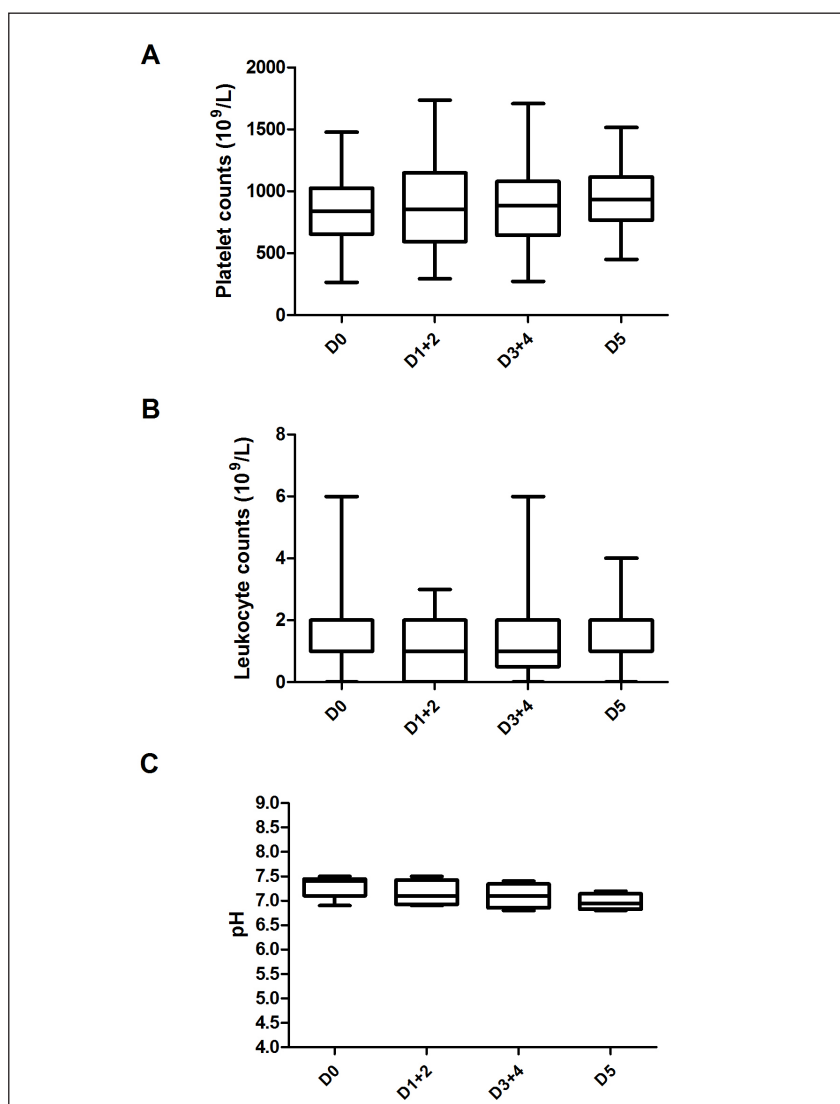**Online Supplementary****Figure S2** - Information about the platelet counts (A), the leucocyte counts (B) and the pH (C) of UPC, depending on storage time.

No significant variations were seen (Kruskal-Wallis test). Data are shown as boxplots with first and third quartiles as limits of the boxes and whiskers representing the minimum and the maximum of the data.  $n=158, 29, 65$  and  $64$  for D0, D1+2, D3+4 and D5, respectively. UPC: unitary platelet concentrate; D: day.
